# Supplementary material for: RAS oncogenic activity predicts response to chemotherapy and outcome in lung adenocarcinoma
Source: Springer Nature journal article supplement (doi:10.1038/s41467-022-33290-0), 2022-09-26
Supplement: MOESM2 [file 41467_2022_33290_MOESM2_ESM.pdf]

## Description of Additional Supplementary Files

- 1 - RAS signature details East et al.
- 2 - RAS84 genes
- 3 - GO\_RAShigh\_vs\_RASlow
- 4 - RAS84\_GDSC\_drugs
- 5 - RAS84\_CTRP\_drugs
- 6 - GO\_RAG\_XvsRAG\_0
- 7 - RAS84\_heterogeneity
- 8 - coxph\_RSG\_results
- 9 - RAS84 ranked genes
- 10 - RASindex\_RASmut\_wilc
- 11 - Control signatures
